# Supplementary material for: The French Early Breast Cancer Cohort (FRESH): a resource for breast cancer research and evaluations of oncology practices based on the French National Healthcare System Database (SNDS)
Source: bioRxiv or medRxiv preprint supplement (doi:10.1101/2022.03.14.22272286), 2022-03-14

## Targeted therapy setting

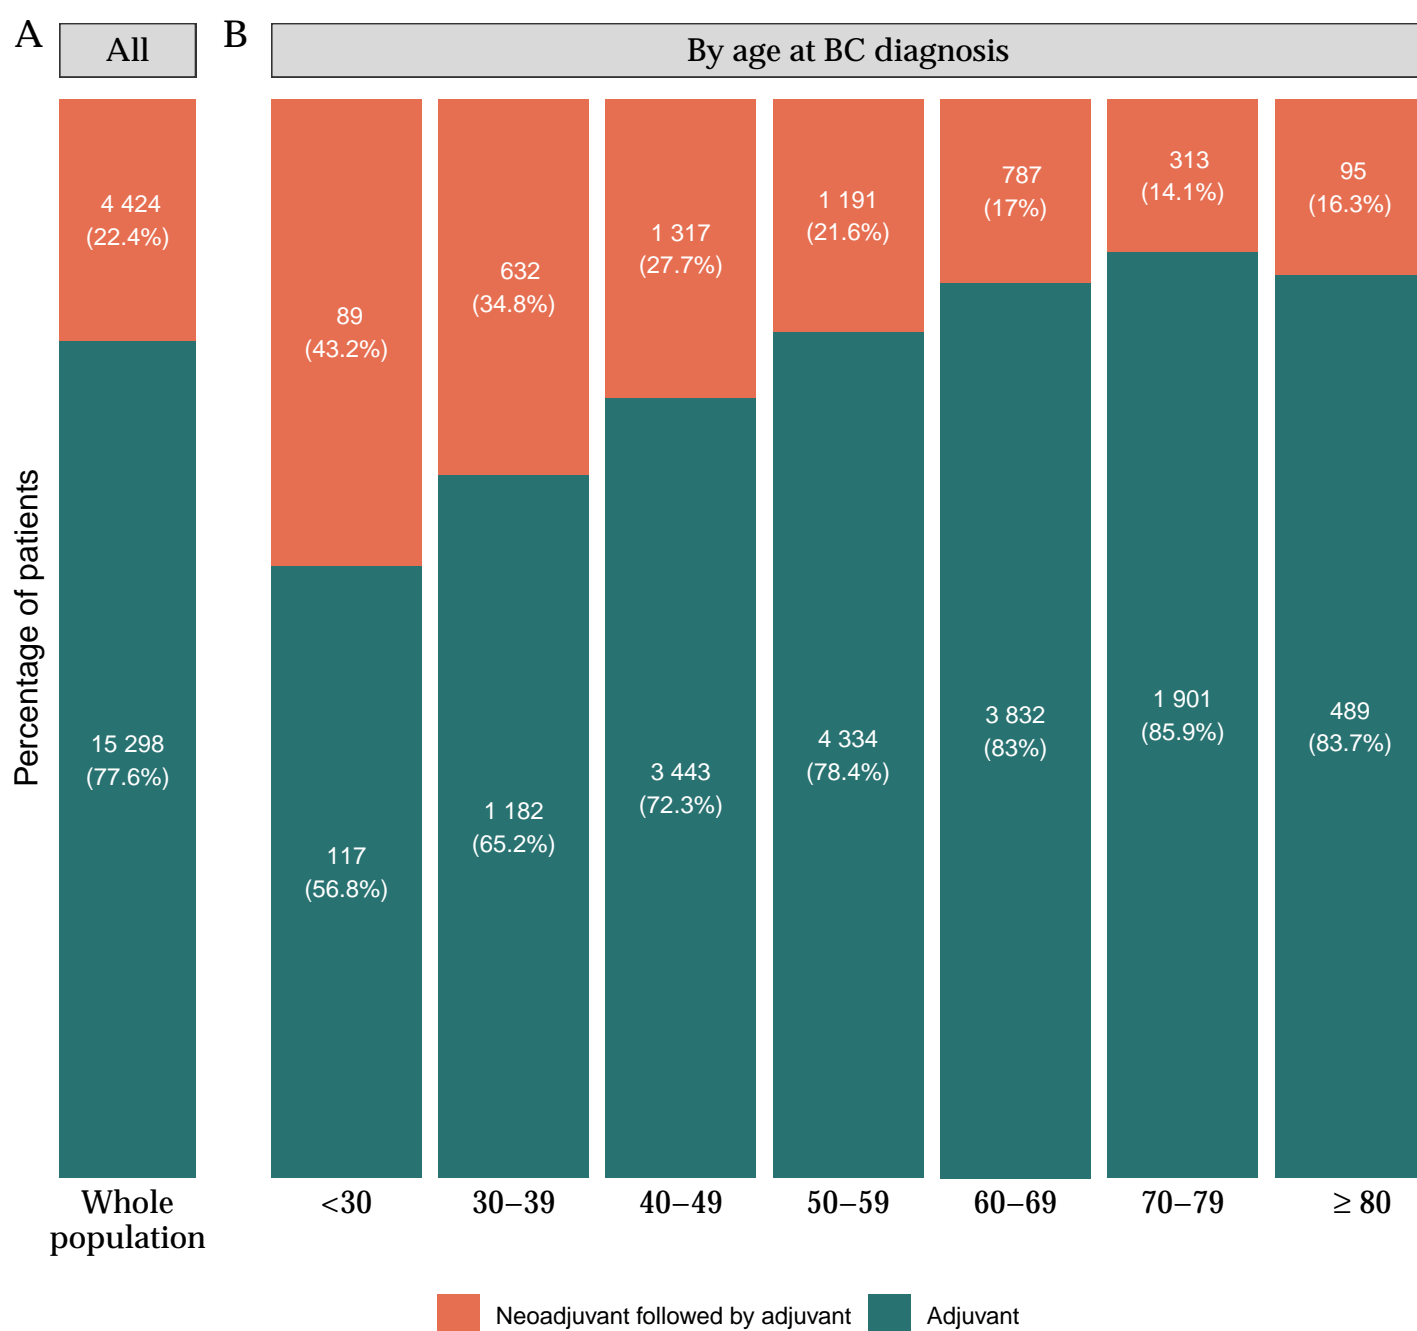

## Targeted therapy regimen

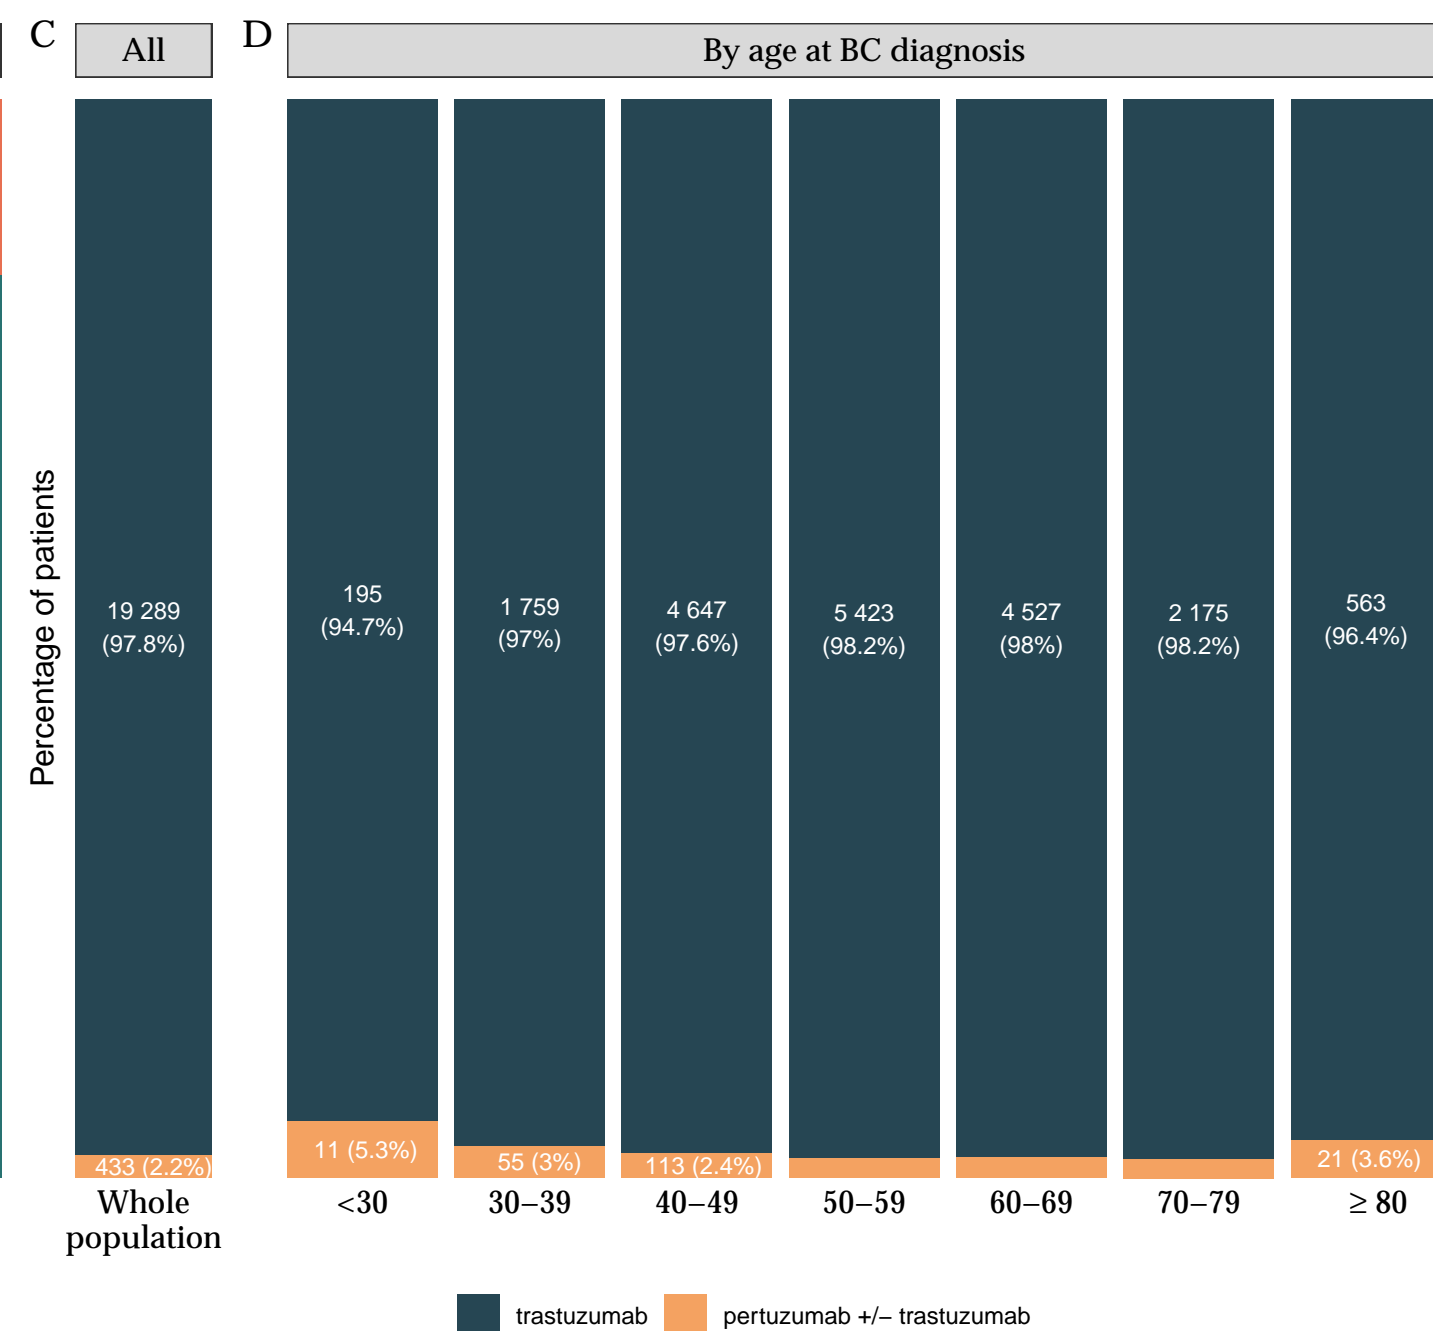

## Combinations of TT and systemic treatments

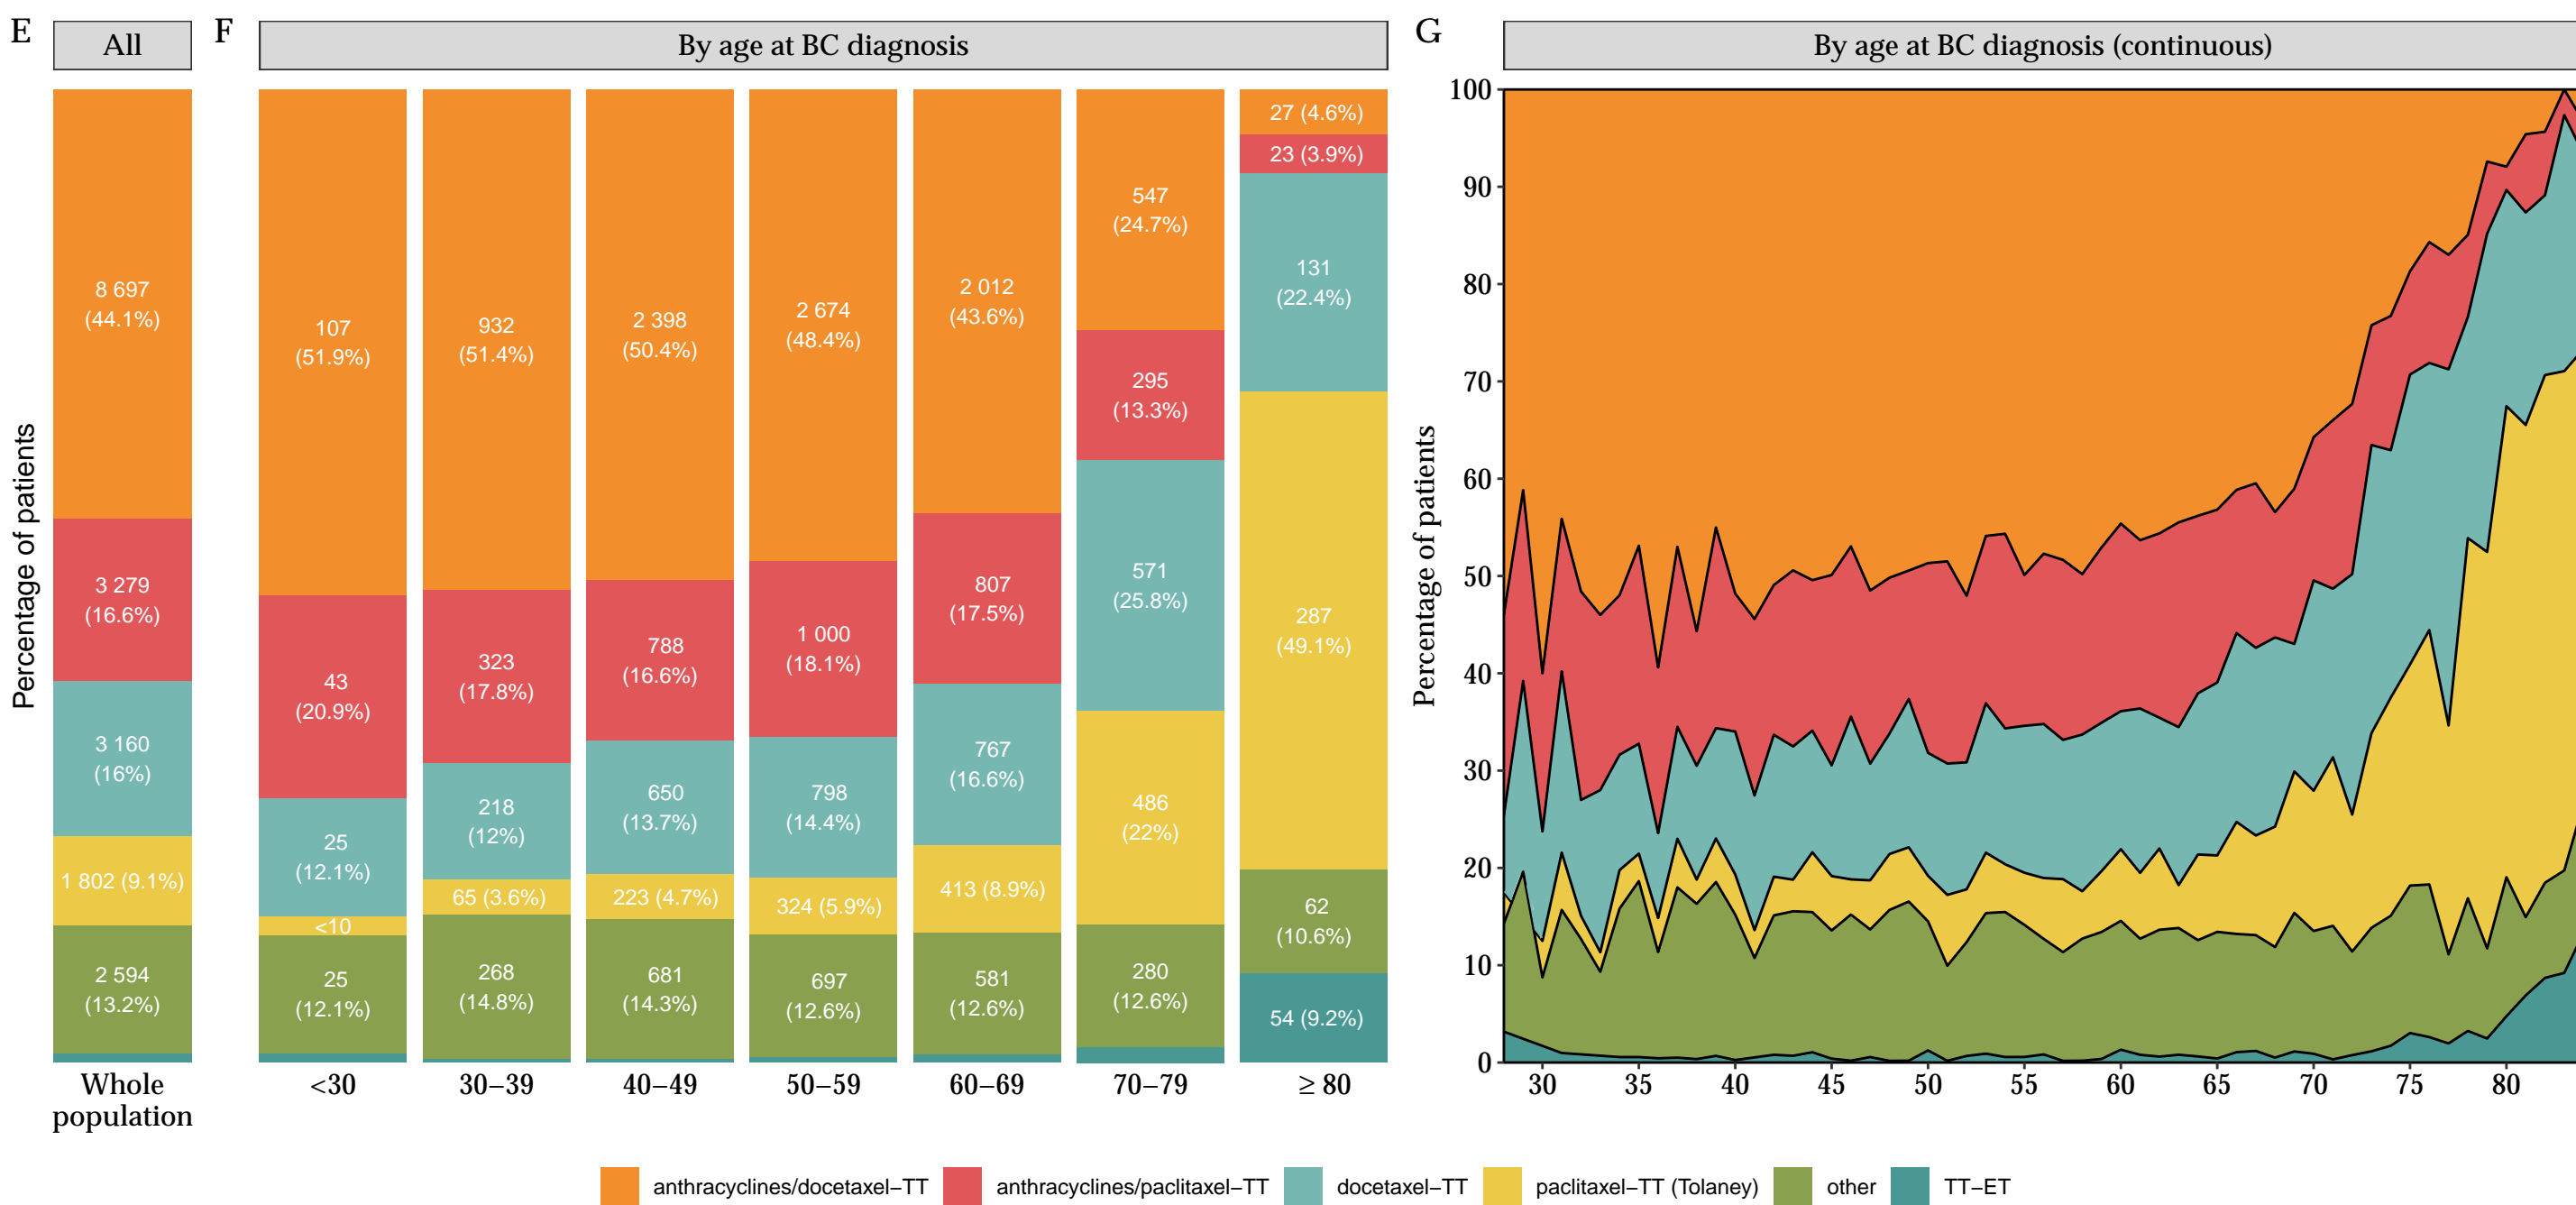

Supplement: Supplementary file [file media-14.pdf]
