# Supplementary material for: The French Early Breast Cancer Cohort (FRESH): a resource for breast cancer research and evaluations of oncology practices based on the French National Healthcare System Database (SNDS)
Source: bioRxiv or medRxiv preprint supplement (doi:10.1101/2022.03.14.22272286), 2022-03-14
Supplement: Supplementary file [file media-16.pdf]

Supp table 1 BC

| Medical data                                               | ICD-10 |
|------------------------------------------------------------|--------|
| Carcinoma <i>in situ</i> of the breast                     | D05    |
| Lobular carcinoma <i>in situ</i> of the breast             | D050   |
| Intraductal carcinoma <i>in situ</i> of the breast         | D051   |
| Other carcinoma <i>in situ</i> of the breast               | D057   |
| Unspecified type of carcinoma <i>in situ</i> of the breast | D059   |
| Malignant breast tumor                                     | C50    |
| Malignant neoplasm of nipple and areola                    | C500   |
| Malignant neoplasm of central portion of the breast        | C501   |
| Malignant neoplasm of upper-inner quadrant of the breast   | C502   |
| Malignant neoplasm of lower-inner quadrant of the breast   | C503   |
| Malignant neoplasm of upper-outer quadrant of the breast   | C504   |
| Malignant neoplasm of lower-outer quadrant of the breast   | C505   |
| Malignant neoplasm of axillary tail of the breast          | C506   |
| Malignant neoplasm of overlapping sites of the breast      | C508   |
| Malignant neoplasm of the breast of unspecified site       | C509   |

**Table S1** : ICD-10 diagnosis codes used to identify breast cancer

Abbreviations : ICD 10 = International Statistical Classification and Related Health Problems – 10<sup>th</sup> revision.
