# Supplementary material for: The French Early Breast Cancer Cohort (FRESH): a resource for breast cancer research and evaluations of oncology practices based on the French National Healthcare System Database (SNDS)
Source: bioRxiv or medRxiv preprint supplement (doi:10.1101/2022.03.14.22272286), 2022-03-14
Supplement: Supplementary file [file media-17.pdf]

Supp\_table\_2\_OtherK

|                                                                         | Medical Data                                         | ICD-10        | Medical Data                                                                               | ICD-10                                 |
|-------------------------------------------------------------------------|------------------------------------------------------|---------------|--------------------------------------------------------------------------------------------|----------------------------------------|
| Diagnosis code of other cancer                                          | Lip                                                  | C00           | Ureter, bladder, other unspecified urinary organs                                          | C66, C67, C68                          |
|                                                                         | Tongue                                               | C01, C02      | Eye and adnexa, meninges                                                                   | C69, C70                               |
|                                                                         | Gum                                                  | C03           | Brain                                                                                      | C71                                    |
|                                                                         | Floor of mouth                                       | C04           | Spinal cord, cranial nerves and other parts of CNS                                         | C72                                    |
|                                                                         | Palate, other and unspecified parts of the mouth     | C05, C06      | Thyroid gland                                                                              | C73                                    |
|                                                                         | Parotid and other salivary glands                    | C07, C08      | Adrenal gland, endo glands and related structures, other ill-defined sites                 | C74, C75, C76                          |
|                                                                         | Tonsil                                               | C09           | Without specification of site                                                              | C80                                    |
|                                                                         | Oro/naso/hypopharynx                                 | C10, C11, C13 | Hodgkin lymphoma                                                                           | C81                                    |
|                                                                         | Pyiform sinus                                        | C12           | Follicular lymphoma                                                                        | C82                                    |
|                                                                         | Lip, oral cavity and pharynx                         | C14           | Non-follicular lymphoma                                                                    | C83                                    |
|                                                                         | Esophagus, stomach                                   | C15, C16      | Mature T/NK-cell lymphomas                                                                 | C84                                    |
|                                                                         | Small intestine, colon                               | C17, C18      | Other and unspecified types of non-Hodgkin lymphoma                                        | C85                                    |
|                                                                         | Rectosigmoid junction, rectum                        | C19, C20      | Multiple myeloma and malignant plasma cell neoplasms                                       | C88                                    |
|                                                                         | Anus and anal canal                                  | C21           |                                                                                            |                                        |
|                                                                         | Liver and intrahepatic bile ducts                    | C22           |                                                                                            |                                        |
|                                                                         | Gallbladder, other and unsp. parts of biliary tract  | C23, C24      | Lymphoid leukemia                                                                          | C91                                    |
|                                                                         | Pancreas, other and ill-defined digestive organs     | C25, C26      | Myeloid leukemia                                                                           | C92                                    |
|                                                                         | Nasal cavity and middle ear, accessory sinuses       | C30, C31      | Monocytic leukemia                                                                         | C93                                    |
|                                                                         | Larynx, trachea, bronchus                            | C32, C33, C34 | Other leukemias of specified cell type                                                     | C94                                    |
|                                                                         | Thymus, heart, mediastinum and pleura                | C37, C38      | Leukemia of unspecified cell type                                                          | C95                                    |
|                                                                         | Respiratory system and intrathoracic organs          | C39           |                                                                                            |                                        |
|                                                                         | Bone and articular cartilage of limbs or unsp. sites | C40, C41      | Other & unspecified malignant neoplasm of lymphoid, hematopoietic cells and tissues        | C96                                    |
|                                                                         | Mesothelioma, Kaposi's sarcoma                       | C45, C46      | Carcinoma <i>in situ</i> of oral, digestive, ear, respiratory, genital, unspecified organs | D00, D01, D02, D07, D09                |
|                                                                         | Peripheral nerves and autonomic nervous system       | C47           |                                                                                            |                                        |
|                                                                         | Retroperitoneum and peritoneum                       | C48           | Neoplasm of uncertain behavior of oral cavity and digestive organs                         | D37, D38, D39, D40, D41, D42, D43, D44 |
|                                                                         | Other connective and soft tissue                     | C49           |                                                                                            |                                        |
|                                                                         | Vulva, vagina                                        | C51, C52      | Myelodysplastic syndromes                                                                  | D46                                    |
|                                                                         | Corpus uteri, part unspecified                       | C54, C55      | Other neoplasm of uncertain behavior of lymphoid, hematopoietic cells and tissues          | D47                                    |
|                                                                         | Ovary, other and unsp. female genital organs         | C56, C57      | Neoplasm of uncertain behavior of other and unsp sites                                     | D48                                    |
|                                                                         | Placenta                                             | C58           |                                                                                            |                                        |
|                                                                         | Penis, other and unsp. male genital organs           | C60, C63      |                                                                                            |                                        |
| Kidney, renal pelvis                                                    | C64, C65                                             |               |                                                                                            |                                        |
|                                                                         | Medical Data                                         | ATC           | Medical Data                                                                               | ATC                                    |
| Chemotherapy or immunotherapy molecules not indicated for breast cancer | BENDAMUSTINE                                         | L01AA09       | RITUXIMAB                                                                                  | L01XC02                                |
|                                                                         | BUSULFAN                                             | L01AB01       | CETUXIMAB                                                                                  | L01XC06                                |
|                                                                         | CARMUSTINE                                           | L01AD01       | PANITUMUMAB                                                                                | L01XC08                                |
|                                                                         | FOTEMUSTINE                                          | L01AD05       | IPILIMUMAB                                                                                 | L01XC11                                |
|                                                                         | RALTITREXED                                          | L01BA03       | TEMSIROLIMUS                                                                               | L01XE09                                |
|                                                                         | PEMETREXED                                           | L01BA04       | TOPOTECAN                                                                                  | L01XX17                                |
|                                                                         | CLADRIBINE                                           | L01BB04       | IRINOTECAN                                                                                 | L01XX19                                |
|                                                                         | CLOFARABINE                                          | L01BB06       | ARSENIC TRIOXIDE                                                                           | L01XX27                                |
|                                                                         | CYTARABINE                                           | L01BC01       | BORTEZOMIB                                                                                 | L01XX32                                |
|                                                                         | AZACITIDINE                                          | L01BC07       | ALEMTUZUMAB                                                                                | L04AA34                                |
|                                                                         | TRABECTEDIN                                          | L01CX01       | LENALIDOMIDE                                                                               | L04AX04                                |
| IDARUBICIN                                                              | L01DB06                                              |               |                                                                                            |                                        |

Table S2 : ICD-10 and ATC codes used to identify cancer at another site.

Abbreviations : ICD-10 = International Statistical Classification and Related Health Problems – 10<sup>th</sup> revision ; ATC = Anatomical Therapeutic and Chemical
