# Supplementary material for: The French Early Breast Cancer Cohort (FRESH): a resource for breast cancer research and evaluations of oncology practices based on the French National Healthcare System Database (SNDS)
Source: bioRxiv or medRxiv preprint supplement (doi:10.1101/2022.03.14.22272286), 2022-03-14
Supplement: Supplementary file [file media-18.pdf]

Supp\_table\_3\_Meta

|                                                    |                                      | Medical data                | ICD-10                                                                                                                                                                                          | ATC     |
|----------------------------------------------------|--------------------------------------|-----------------------------|-------------------------------------------------------------------------------------------------------------------------------------------------------------------------------------------------|---------|
| Diagnosis code for metastatic disease              |                                      | Metastatic disease          | C770, C771, C772,<br>C774, C775, C778,<br>C779, C78, C780,<br>C781, C782, C783,<br>C784, C785, C786,<br>C787, C788, C79,<br>C790, C791, C792,<br>C793, C794, C795,<br>C796, C797, C798,<br>C799 |         |
| Molecules indicated only<br>for metastatic disease | Chemotherapy                         | CAPECITABINE                |                                                                                                                                                                                                 | L01BC06 |
|                                                    |                                      | CARBOPLATIN                 |                                                                                                                                                                                                 | L01XA02 |
|                                                    |                                      | CISPLATIN                   |                                                                                                                                                                                                 | L01XA01 |
|                                                    |                                      | DOXORUBICIN (only CAELYX®)  |                                                                                                                                                                                                 | L01DB01 |
|                                                    |                                      | ERIBULIN                    |                                                                                                                                                                                                 | L01XX41 |
|                                                    |                                      | ETOPOSIDE                   |                                                                                                                                                                                                 | L01CB01 |
|                                                    |                                      | GEMCITABINE                 |                                                                                                                                                                                                 | L01BC05 |
|                                                    |                                      | MELPHALAN                   |                                                                                                                                                                                                 | L01AA03 |
|                                                    |                                      | METHOTREXATE                |                                                                                                                                                                                                 | L01BA01 |
|                                                    |                                      | MILTEFOSINE                 |                                                                                                                                                                                                 | L01XX09 |
|                                                    |                                      | MITOMYCIN                   |                                                                                                                                                                                                 | L01DC03 |
|                                                    |                                      | MITOXANTRONE                |                                                                                                                                                                                                 | L01DB07 |
|                                                    |                                      | PIRARUBICIN                 |                                                                                                                                                                                                 | L01DB08 |
|                                                    |                                      | THIOTEPA                    |                                                                                                                                                                                                 | L01AC01 |
|                                                    | VINBLASTINE                          |                             | L01CA01                                                                                                                                                                                         |         |
|                                                    | VINCRISTINE                          |                             | L01CA02                                                                                                                                                                                         |         |
|                                                    | VINDESINE                            |                             | L01CA03                                                                                                                                                                                         |         |
| VINORELBINE                                        |                                      | L01CA04                     |                                                                                                                                                                                                 |         |
|                                                    | <b>HER2- Targeted Therapy</b>        | LAPATINIB                   |                                                                                                                                                                                                 | L01XE07 |
|                                                    | <b>Non-HER2 Targeted<br/>Therapy</b> | BEVACIZUMAB                 |                                                                                                                                                                                                 | L01XC07 |
|                                                    |                                      | BYL719 (ALPELISIB)          |                                                                                                                                                                                                 | L01XE   |
|                                                    |                                      | EVEROLIMUS                  |                                                                                                                                                                                                 | L01XE10 |
|                                                    |                                      | PALBOCICLIB                 |                                                                                                                                                                                                 | L01XE33 |
|                                                    | <b>Endocrine Therapy</b>             | TOREMIFENE                  |                                                                                                                                                                                                 | L02BA02 |
|                                                    |                                      | FORMESTANE                  |                                                                                                                                                                                                 | L02BG02 |
|                                                    |                                      | FULVESTRANT                 |                                                                                                                                                                                                 | L02BA03 |
|                                                    | <b>Other</b>                         | DEXRAZOXANE                 |                                                                                                                                                                                                 | V03AF02 |
|                                                    |                                      | SAMARIUM (153SM) LEXIDRONAM |                                                                                                                                                                                                 | V10BX02 |

**Table S3:** ICD-10 and ATC codes used to identify *de novo* metastatic breast cancer.

Abbreviations: ICD 10 = International Statistical Classification and Related Health Problems – 10<sup>th</sup> revision ; ATC = Anatomical Therapeutic and Chemical Classification.
