# Supplementary material for: The French Early Breast Cancer Cohort (FRESH): a resource for breast cancer research and evaluations of oncology practices based on the French National Healthcare System Database (SNDS)
Source: bioRxiv or medRxiv preprint supplement (doi:10.1101/2022.03.14.22272286), 2022-03-14
Supplement: Supplementary file [file media-21.pdf]

Supp\_table\_6\_Diag

| Medical data                    |                    | CCAM                                                                                     |
|---------------------------------|--------------------|------------------------------------------------------------------------------------------|
| Breast core biopsy              |                    | QEHA001, QEHA002, QEHB002, QEHJ001, QEHH001, QEHJ005, QEHJ006, QEHH002, QEHH015, QEHJ004 |
| Fine needle aspiration cytology |                    | QEHB001, QEHJ002, QEHJ003, QEHH003, QEHP002                                              |
| Breast imaging procedures       | Mammography        | QEQK001, QEQK004, QEQK005                                                                |
|                                 | Mammary ultrasound | QEQM001                                                                                  |
|                                 | Mammary MRI        | QEQJ001, QEQN001                                                                         |
|                                 | CT scan            | QEQH002, QEQK006                                                                         |
|                                 | Galactography      | QEQH001                                                                                  |

**Table S6: CCAM codes used to identify diagnostic procedures for breast cancer**

Abbreviations: CCAM = French Common Classification of Medical Procedures; CT = computed tomography.
